# Supplementary material for: Haplotype-resolved genome assembly of seed hemp (Cannabis sativa) revealed molecular divergence of Y chromosome evolution
Source: Research Square preprint supplement (doi:10.21203/rs.3.rs-6374740/v1), 2025-06-03
Supplement: Supplementary file 1 [file 22e27f18af83ffb8e37bdafe.docx]

**Haplotype-resolved genome assembly of seed hemp (*Cannabis sativa*) revealed molecular divergence of Y chromosome evolution**

Huawei Wei, Zuqing Yang, Lingling Zhuang, Xueqing Pan, Haifeng Jia, Shaolian Jiang, Qin Li, Jiantang Xu, Aifen Tao, Pingping Fang, Jianmin Qi, Ray Ming, Liwu Zhang


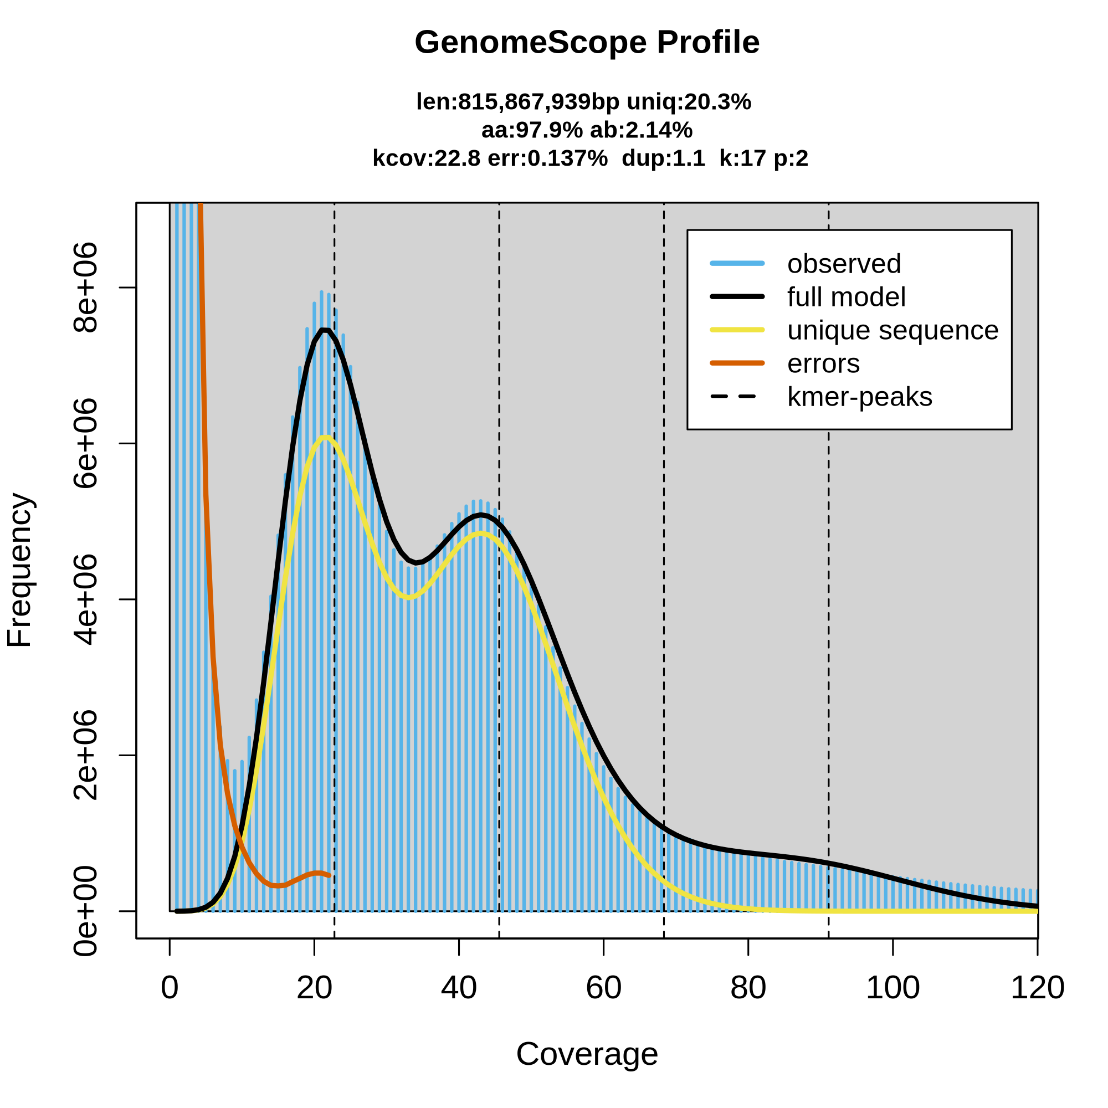


**Fig. S1.** Genome size, heterozygous and duplications of seed hemp predicted by K-mer (k=17) analysis. GenomeScope is used to draw the K-mer distribution. The genome size was estimated 816 Mb, genome heterozygosity was 2.14% and genome duplication was 1.1%.


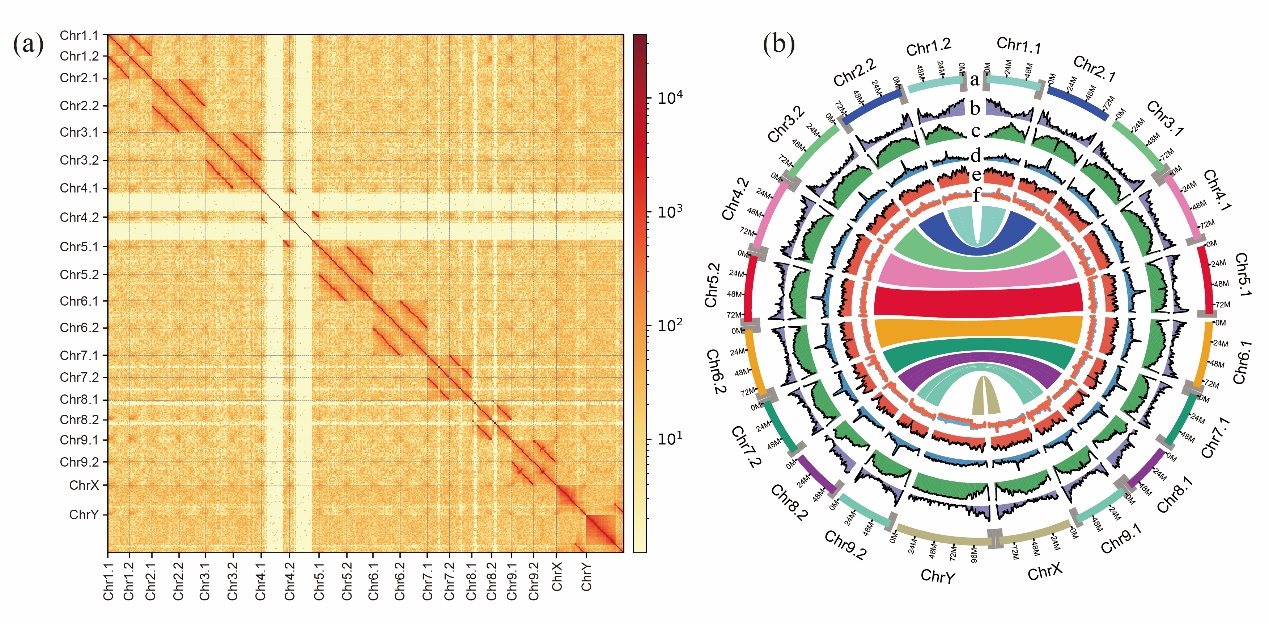


**Fig. S2.** Hi-C map and overview of the haplotype-resolved genomic features of dioecious seed hemp with YSM1 and YSM2. (a) Map of Hi-C links among 10 pseudochromosomes. (b) Haplotype-resolved genomic features. a, Length (Mb) of chromosomes; b, gene density; c, TE density; d, GC content, e, LAI distribution; f, BSA reads cover depth, with males in blue and females in red.


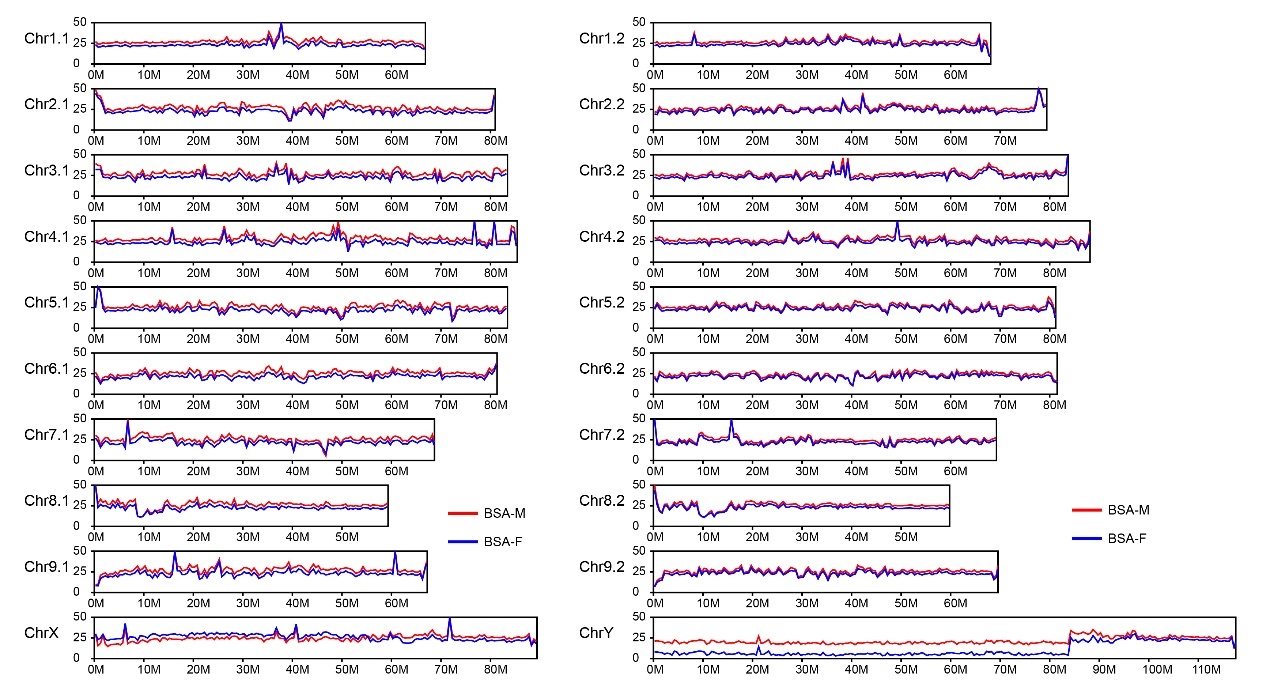


**Fig. S3.** Mapping results of BSA data to the YSM1 and YSM2 of seed hemp.


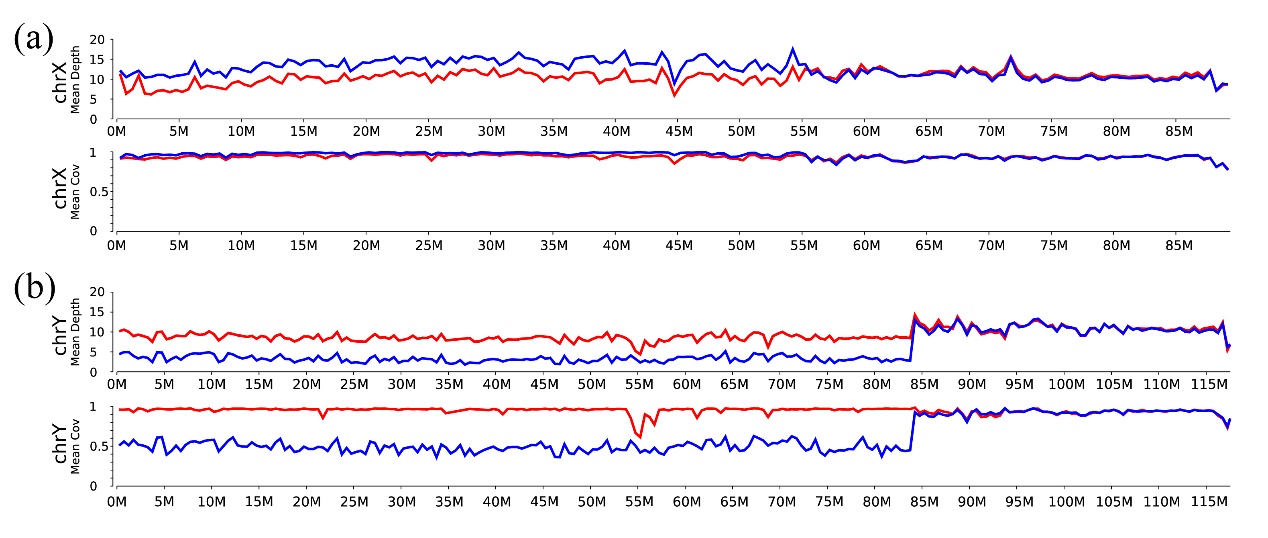


**Fig. S4.** Mapping results of resequencing data from leaves in male and female of 11 seed hemp varieties to the X and Y chromosomes. (a) depth of resequencing data coverage on the X chromosome. (b) depth of resequencing data coverage on the Y chromosome. The red line represents the male sample and the blue represents the female sample.


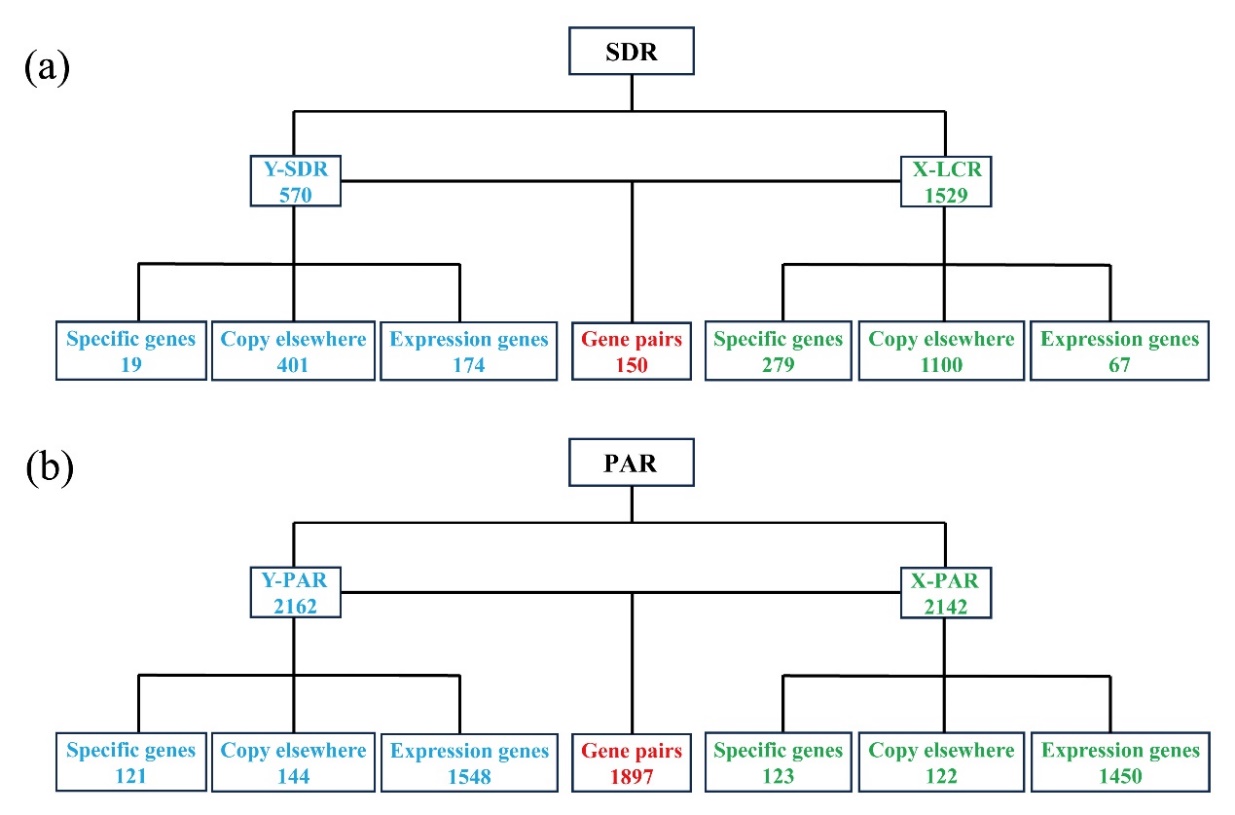


**Fig. S5.** Distribution of encoding genes in the Y and corresponding X.

(a) The genes distribution of SDR and its corresponding region on the X chromosome. SDR: Sex-determined region, Y-SDR: SDR on the Y chromosome, X-LCR: X-linked colinear region. (b) The genes distribution in the PAR on the X and Y chromosomes. PAR: Pseudo-autosomal region, Y-PAR: Pseudo-autosomal region on the Y chromosome, X-PAR: Pseudo-autosomal region on the X chromosome.
