# Supplementary material for: Haplotype-resolved genome assembly of seed hemp (Cannabis sativa) revealed molecular divergence of Y chromosome evolution
Source: Research Square preprint supplement (doi:10.21203/rs.3.rs-6374740/v1), 2025-06-03
Supplement: Supplementary file 2 [file 4efa3a8199adddce39c8bd0b.xlsx]

## Sheet: Table S1
Table S1. Sequencing information of YSM genome.
	PacBio HiFi	ONT
Total number of reads	1501184	2104986
Total number of bases (Gb)	26.27	39.57
Mean reads length (bp)	17501	18799
Longest Read (bp)	49596	787632
N50 (bp)	18366	50000
Coverage	32	49

## Sheet: Table S2
Table S2. Statistics of chromosome-anchored contigs for the male seed hemp genome.
	YSM1			YSM2
ChrID	No. of contigs	Length (bp)	Percentage (%)	No. of contigs	Length (bp)	Percentage (%)
Chr1	2	66857744	8.67	2	68103906	8.46
Chr2	3	80934653	10.5	4	79404072	9.87
Chr3	3	83409340	10.82	3	83784867	10.41
Chr4	2	85376231	11.08	1	88143688	10.95
Chr5	1	83397434	10.82	2	81210029	10.09
Chr6	2	81293374	10.55	2	81521152	10.13
Chr7	5	68661764	8.91	2	69263679	8.61
Chr8	2	59313966	7.69	1	59793029	7.43
Chr9	3	67214206	8.72	1	69557843	8.64
ChrX	1	89373993	11.59	-	-	-
ChrY	-	-	-	4	117555997	14.61
unanchored contigs	39	4992304	0.65	33	6405336	0.8
Total length	63	770825009	100	55	804743598	100

## Sheet: Table S3
Table S3. Genome assembly and annotation of dioecious seed hemp with YSM1 and YSM2.
Genomic features	YSM1	YSM2
Total genome size (Mb)	770.8	804.7
Max. contig length (Mb)	89.4	88.1
Min. contig length (Kb)	27.8	40.5
Contig N50 length (Mb)	40	47.4
Max. scaffold length (Mb)	89.4	117.6
Min. scaffold length (Kb)	59.3	59.8
Scaffold N50 length (Mb)	81.3	81.2
GC content (%)	34.2	34.2
LAI	23	21
Number of genes	32519	31465
Average of gene length (bp)	2804	2809
Average of CDS length (bp)	1125	1109
Complete BUSCOs (%)	98.3	96.3

## Sheet: Table S4
Table S4. Busco assessment of male seed hemp genome assembly.
Statistics	YSM1	YSM2	Combine
Complete BUSCOs (%)	98.8	95.8	99.1
Complete and single-copy BUSCOs (%)	97.3	94.6	3.5
Complete and duplicated BUSCOs (%)	1.5	1.2	95.6
Fragmented BUSCOs (%)	0.4	0.7	0.2
Missing BUSCOs (%)	0.8	3.5	0.7

## Sheet: Table S5
Table S5. LAI value statistics of male seed hemp genome YSM.
ChrID	YSM1	YSM2
Chr1	26.19	25.52
Chr2	23.46	22.58
Chr3	23.13	21.62
Chr4	24.49	23.7
Chr5	21.34	21.44
Chr6	24.18	21.87
Chr7	21.94	21.34
Chr8	21.28	20.86
Chr9	21.82	21.24
ChrX	24.64	-
ChrY	-	17.63
Whole	23.04	20.99

## Sheet: Table S6
Table S6. Genes annotation in the male seed hemp genome.
Gene set	YSM1	YSM2
Number	32519	31465
RNA-seq confirmed (%)	92.21	92.03
Average gene length (bp)	2804.62	2809.52
Average CDS length (bp)	1125.83	1109.82
Average exon per gene	4.39	4.31
Average exon length (bp)	256.64	257.4
Average intron length (bp)	495.68	513.26

## Sheet: Table S7
Table S7. Global statistics comparison of hemp assembly between the present genome and previously published genome (Female seed hemp (YSF) and wild-type C. sativa "JL").
Items	JL	YSF	YSM1	YSM2
Subreads N50 (kb)	13.5	32.9	50	50
Total size (Mb)	808	794	770.8	804.7
Contig N50 (Mb)	0.51	7.3	40	47.4
LAI	18.2	20.35	23	21
GC content (%)	34	34	34.2	34.2
Protein coding gene number	38828	31091	32519	31465
Average length (bp)	551.1	3734.11	2804.62	2809.52
Average exon length (bp)	281.91	333.26	256.64	257.4
Complete BUSCOs (%)	92.6	95.97	98.3	96.3

## Sheet: Table S8
Table S8. Gene annotation of male seed hemp genes in different databases.
	YSM1		YSM2
	Number	Percent (%)	Number	Percent (%)
Total	32519	100	31465	100
Swissprot	16959	52.15	16445	52.26
KEGG	28048	86.25	27075	86.05
Trembl	31068	95.54	30069	95.56
Interpro	21644	66.56	20779	66.04
Nr	30669	94.31	29688	94.35
GO	12529	38.53	11928	37.91
Unanotated	1286	3.95	1230	3.91

## Sheet: Table S9
Table S9. BUSCO analysis of gene annotation for the YSM genomes.
Statistics	Number	Percent (%)	Number	Percent (%)
Complete BUSCOs (%)	1587	98.3	1554	96.3
Complete and single-copy BUSCOs (%)	1563	96.8	1533	95
Complete and duplicated BUSCOs (%)	24	1.5	21	1.3
Fragmented BUSCOs (%)	4	0.2	2	0.1
Missing BUSCOs (%)	23	1.5	58	3.6

## Sheet: Table S10
Table S10. Summary of different types and distribution of TE elements in male seed hemp genomes.
		YSM1			YSM2
Type	Class	Count	Masked (bp)	masked (%)	Count	Masked (bp)	masked (%)
LTR	Copia	136687	132663969	17.21	166082	143815586	17.87
	Gypsy	110919	158439894	20.55	159576	181398181	22.54
	unknown	210100	137551583	17.84	155041	106839388	13.28
TIR	CACTA	40786	18445418	2.39	42896	17098282	2.12
	Mutator	71291	27544707	3.57	86631	65240539	8.11
	PIF_Harbinger	19090	9185402	1.19	21518	8096980	1.01
	Tc1_Mariner	3029	29702373	3.85	3680	31637469	3.93
	hAT	24962	8253827	1.07	31054	10410564	1.29
nonLTR	LINE_element	6268	3204386	0.42	7733	3951906	0.49
nonTIR	helitron	56257	22271805	2.89	47135	16219471	2.02
Other		83312	27264136	3.54	90821	29521819	3.67
Total		762701	574527500	74.53	812167	614230185	76.33

[truncated: 5 more sheets: Table S11, Table S12, Table S13, Table S14, Table S15]
